# Supplementary material for: α-Glucosidase inhibitory activities of phenolic acid amides with l-amino acid moiety
Source: Royal Society of Chemistry journal article supplement (doi:10.1039/c6ra08330g), 2016-01-01

## Supporting Information

### The $\alpha$ -glucosidase Inhibitory Activities of Phenolic Acid Amides with L-Amino Acid Moiety

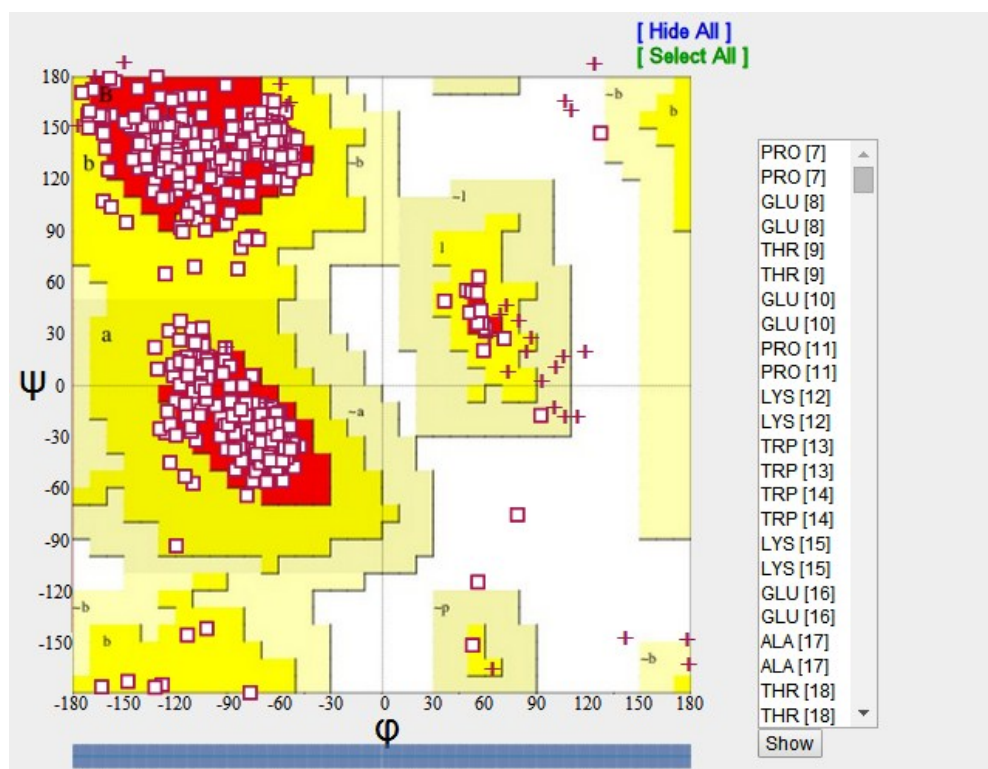

Fig. S1 Ramachandran Plot of the modeling 3D structure of  $\alpha$ -glucosidase

Table S1 Observed and predicted activities for training set and test set (\*)compounds against  $\alpha$ -glucosidase

| Compound | pIC <sub>50</sub> |           |          | Compound | pIC <sub>50</sub> |           |          |
|----------|-------------------|-----------|----------|----------|-------------------|-----------|----------|
|          | Observed          | Predicted | Residual |          | Observed          | Predicted | Residual |
| a1*      | -1.54             | -1.230    | -0.307   | b1       | -0.548            | -0.664    | 0.117    |
| a2       | -1.363            | -1.127    | -0.236   | b2       | -0.984            | -0.962    | -0.022   |
| a3       | -1.498            | -1.659    | 0.160    | b3       | -0.808            | -0.705    | -0.103   |
| a4       | -1.249            | -1.169    | -0.08    | b4       | -1.025            | -1.283    | 0.258    |
| a5       | -1.346            | -1.479    | 0.133    | b5*      | -1.185            | -1.14     | -0.044   |
| a6       | -0.334            | -0.35     | 0.015    | b6*      | -1.469            | -0.214    | -1.254   |
| a7       | -0.328            | -0.361    | 0.033    | b7       | -0.068            | -0.07     | 0.002    |
| a8       | -1.285            | -1.284    | -0.001   | b8       | -1.048            | -0.817    | -0.231   |
| a9*      | -0.265            | -0.101    | -0.164   | b9       | -0.597            | -0.524    | -0.073   |
| a10      | -0.041            | -0.024    | -0.017   | b10      | -0.079            | 0.02      | 0.099    |
| a11      | -0.634            | -0.656    | 0.022    | b11      | -0.467            | -0.514    | 0.047    |
| a12      | -0.512            | -0.509    | -0.003   | b12*     | -0.580            | -0.623    | -0.043   |
| a13      | -0.322            | -0.403    | 0.081    | b13      | -0.290            | -0.308    | 0.018    |
| a14      | -0.281            | -0.291    | 0.01     | b14      | -0.185            | -0.105    | -0.08    |
| c1       | 0.143             | 0.219     | -0.077   | c8       | 1.398             | 1.088     | 0.31     |
| c2       | 1.398             | 1.25      | 0.148    | c9       | 0.167             | 0.108     | 0.059    |
| c3       | 1.161             | 1.173     | -0.012   | c10      | -0.534            | -0.511    | -0.023   |
| c4       | 0.569             | 0.781     | -0.212   | c11*     | -0.152            | 0.125     | -0.277   |
| c5       | 0.398             | 0.5       | -0.102   | c12      | 0.638             | 0.623     | 0.015    |
| c6       | 0.678             | 0.751     | -0.073   | c13      | 0.921             | 0.816     | 0.105    |
| c7       | 0.523             | 0.613     | -0.09    | c14*     | 0.886             | 0.841     | 0.045    |

### <sup>1</sup>H NMR spectra of compound a1

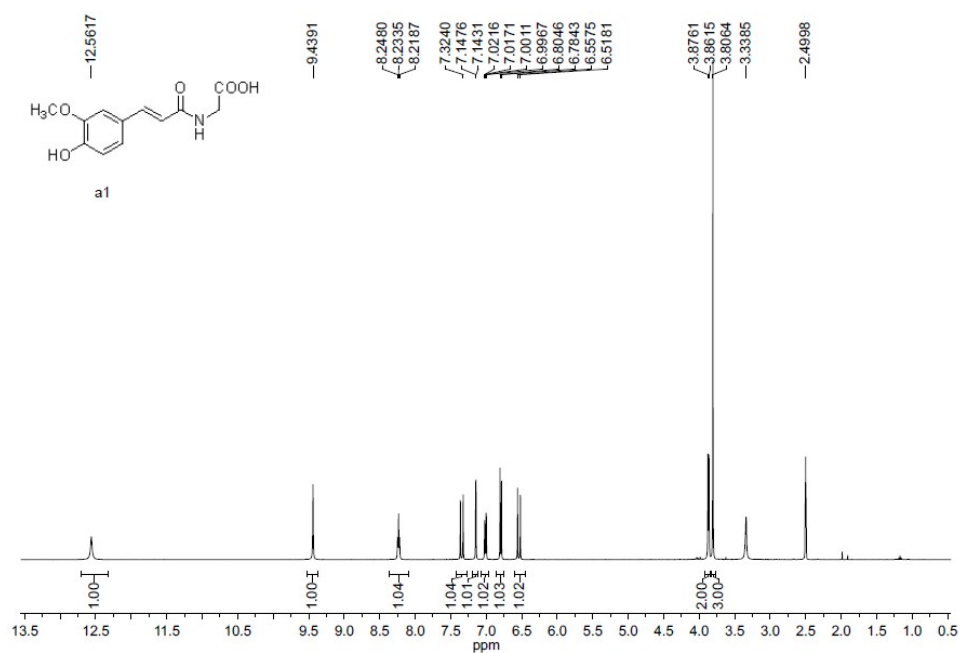

### <sup>1</sup>H NMR spectra of compound a2

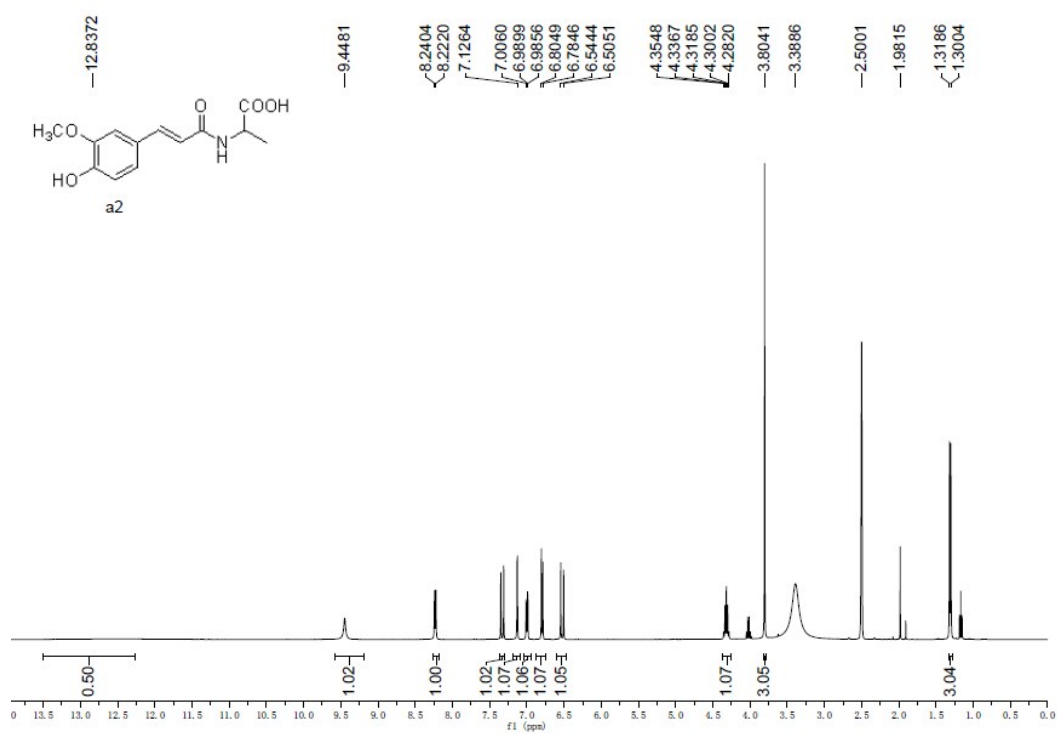

### <sup>1</sup>H NMR spectra of compound a3

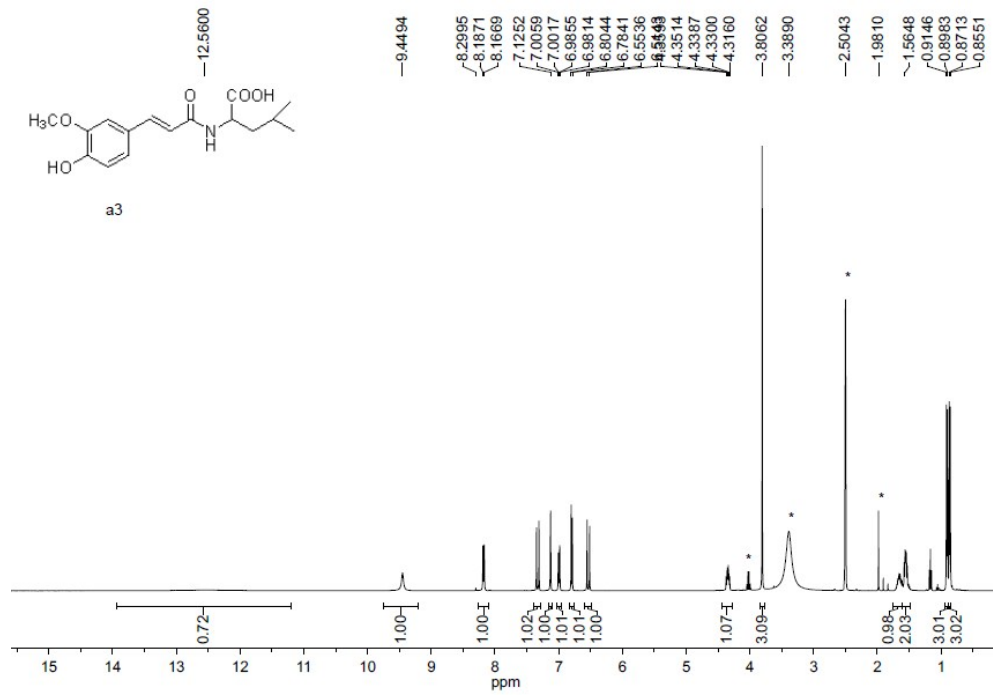

### <sup>1</sup>H NMR spectra of compound a4

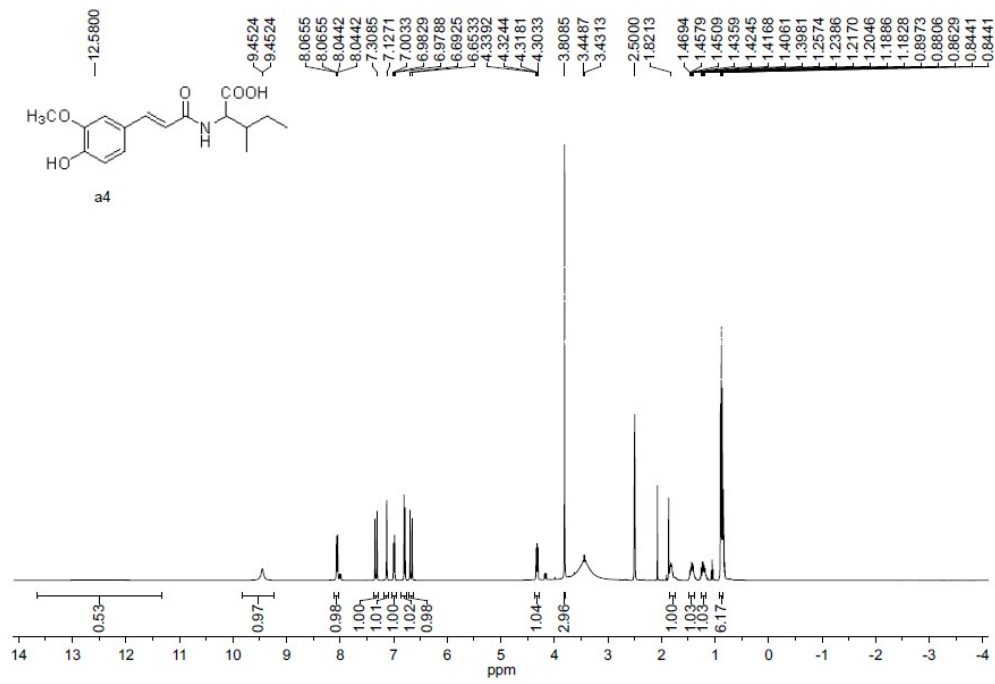

### <sup>1</sup>H NMR spectra of compound a5

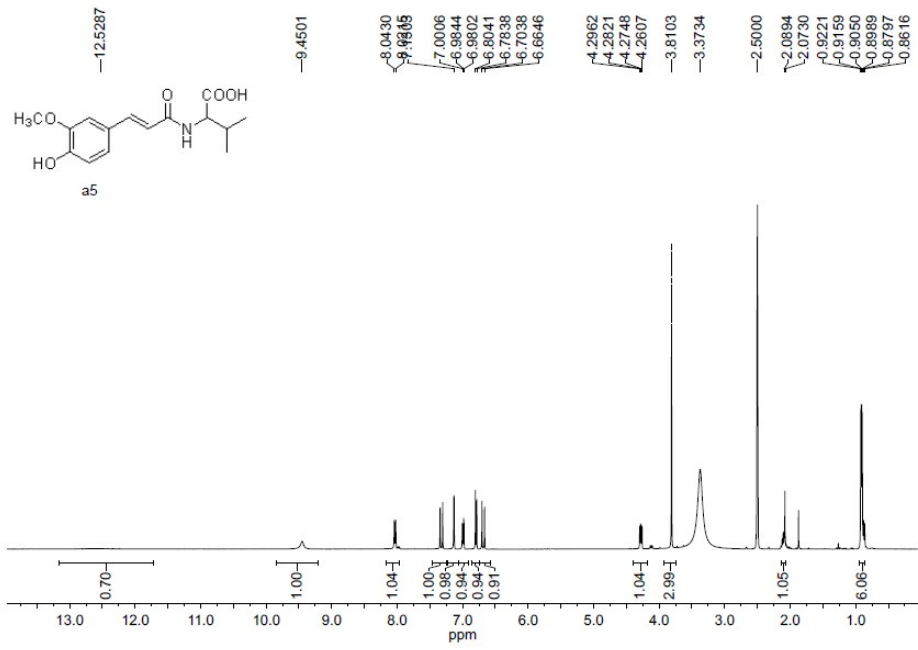

### <sup>1</sup>H NMR spectra of compound a6

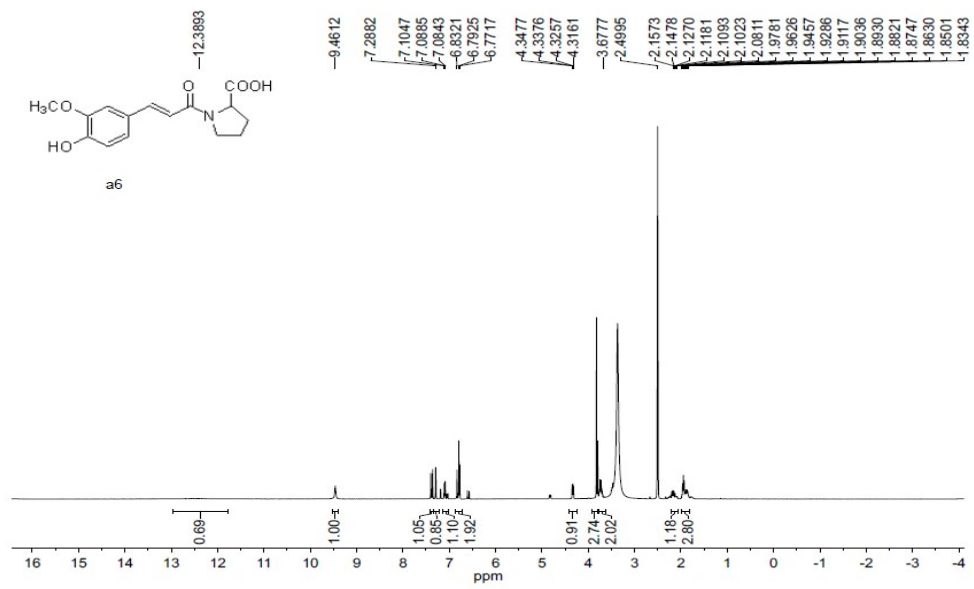

### <sup>1</sup>H NMR spectra of compound a7

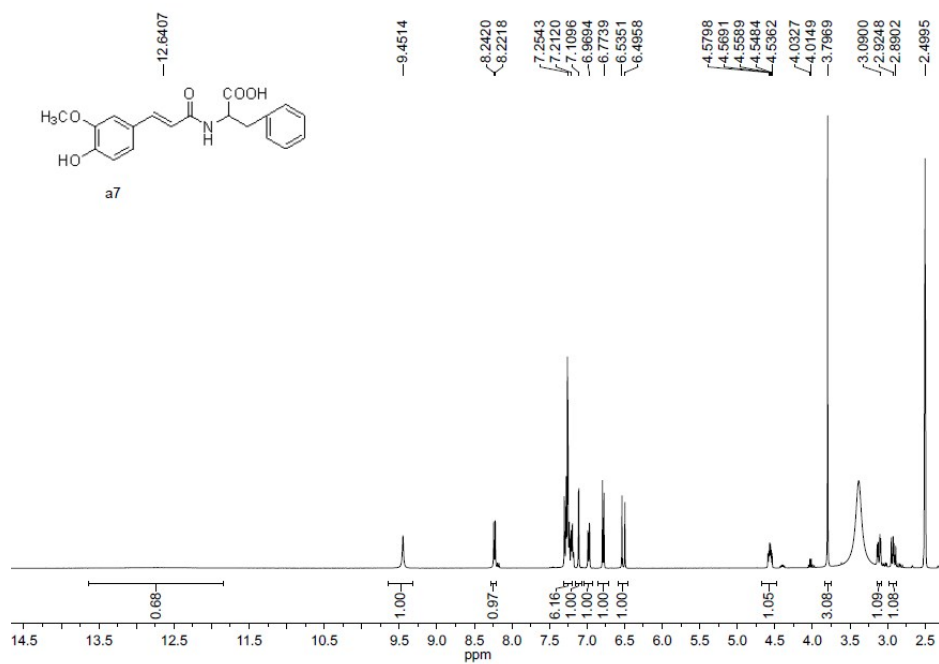

### <sup>1</sup>H NMR spectra of compound a8

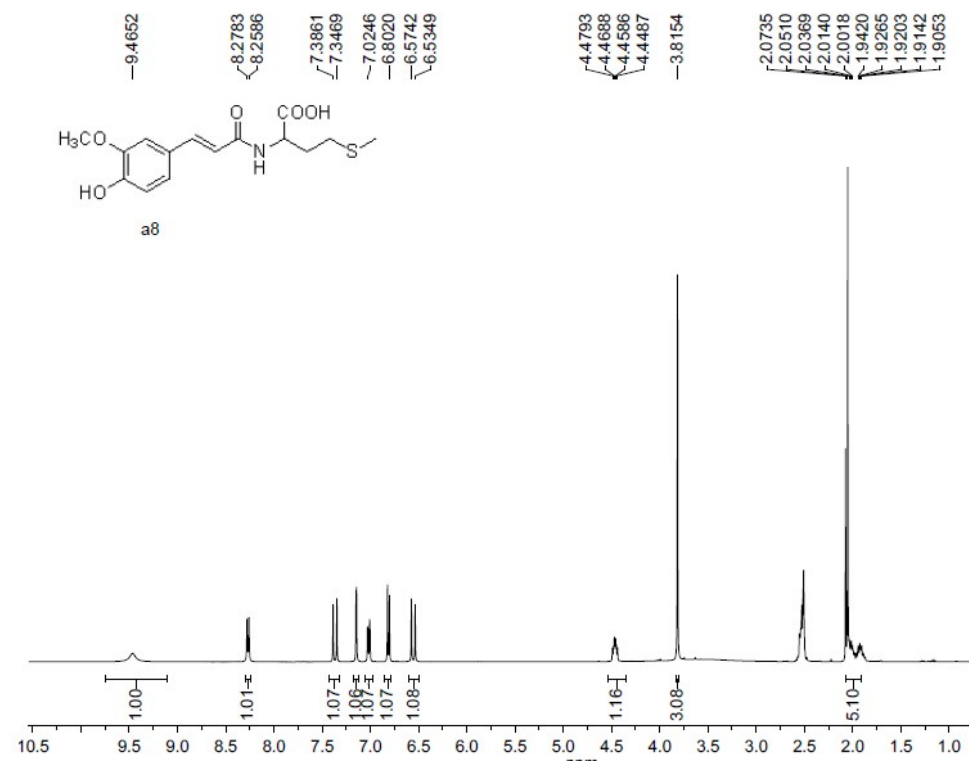

### <sup>1</sup>H NMR spectra of compound a9

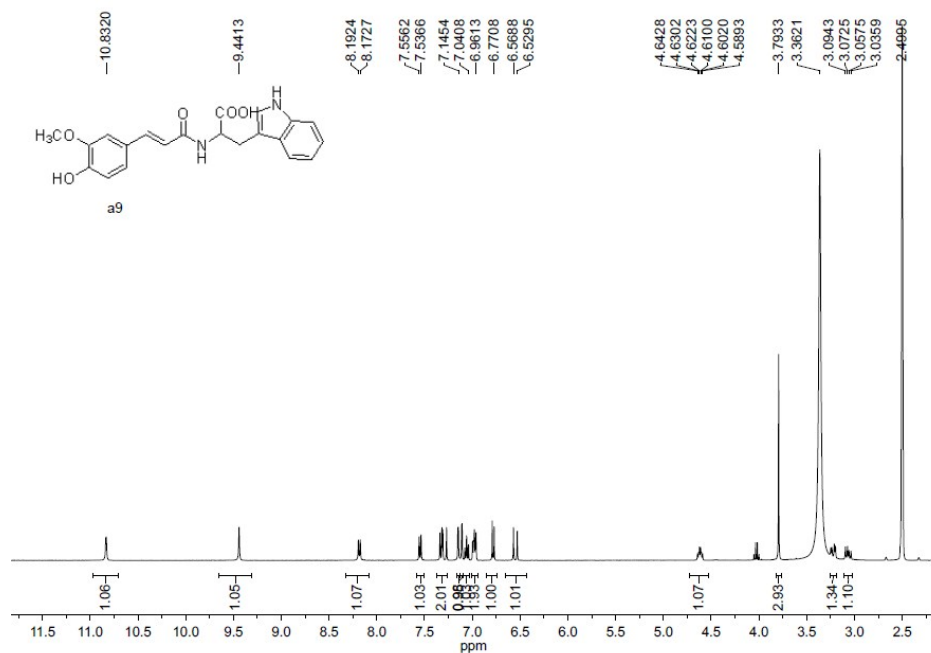

### <sup>1</sup>H NMR spectra of compound a10

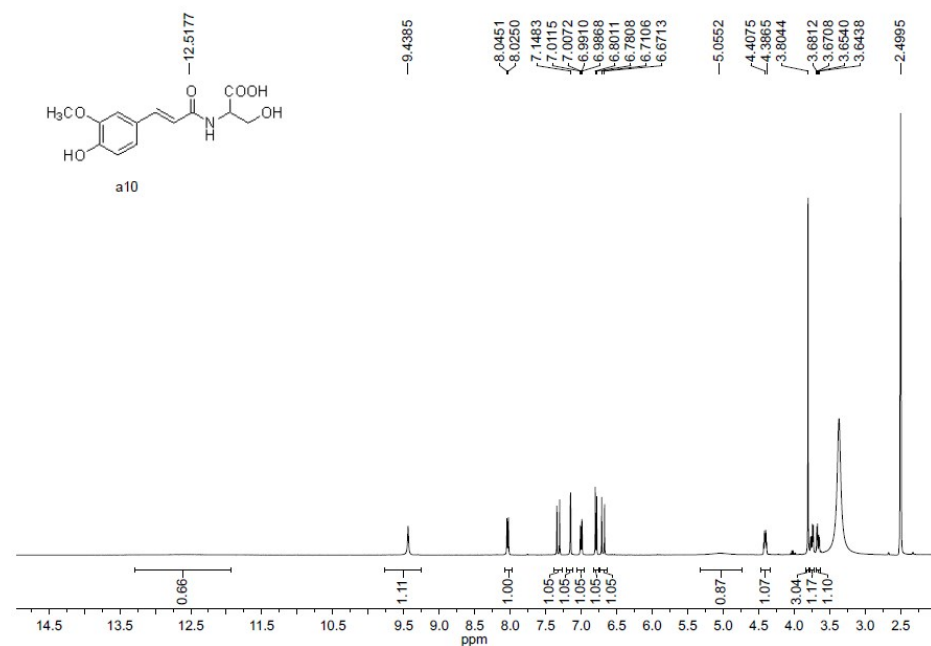

# <sup>1</sup>H NMR spectra of compound a11

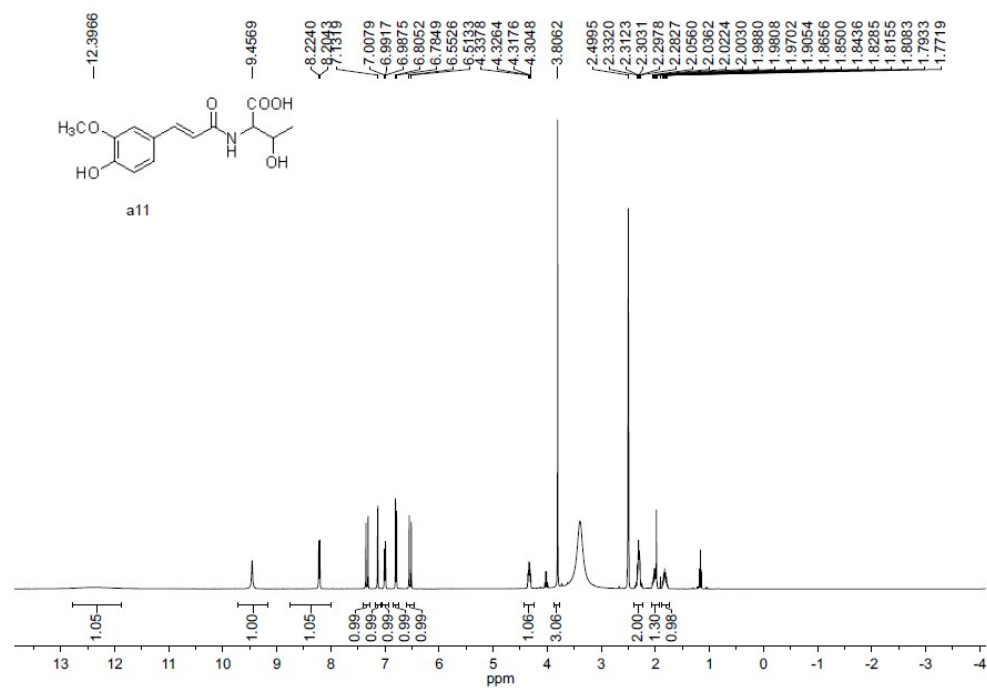

# <sup>1</sup>H NMR spectra of compound a12

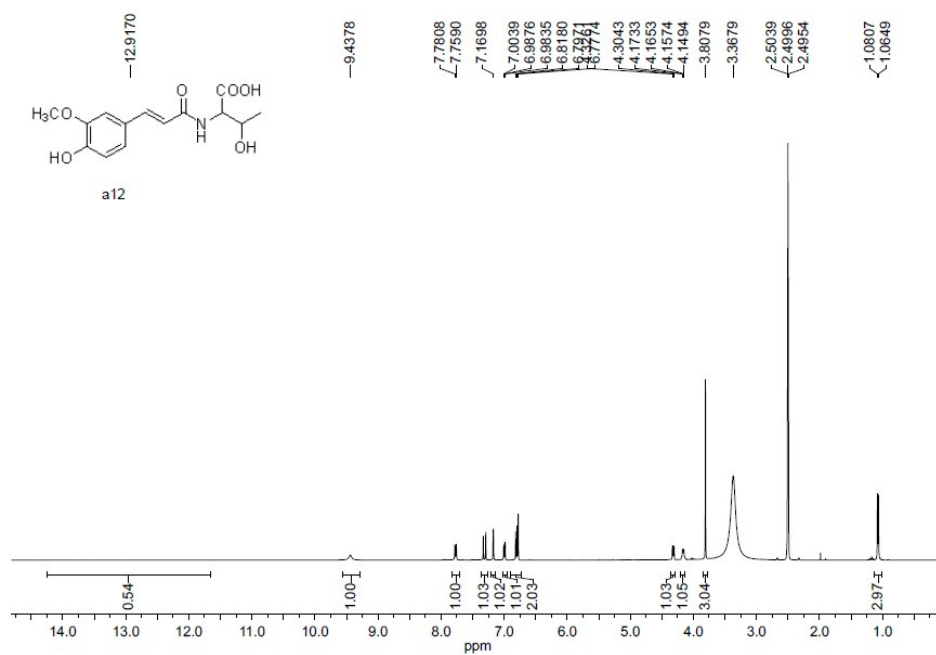



### <sup>1</sup>H NMR spectra of compound **a13**

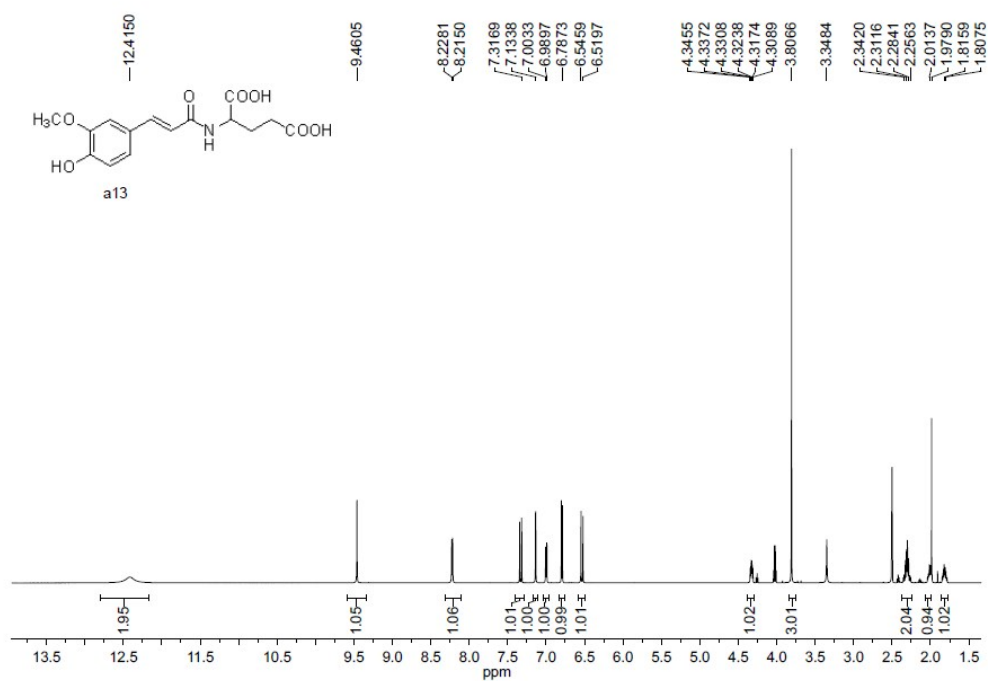

### <sup>1</sup>H NMR spectra of compound **a14**

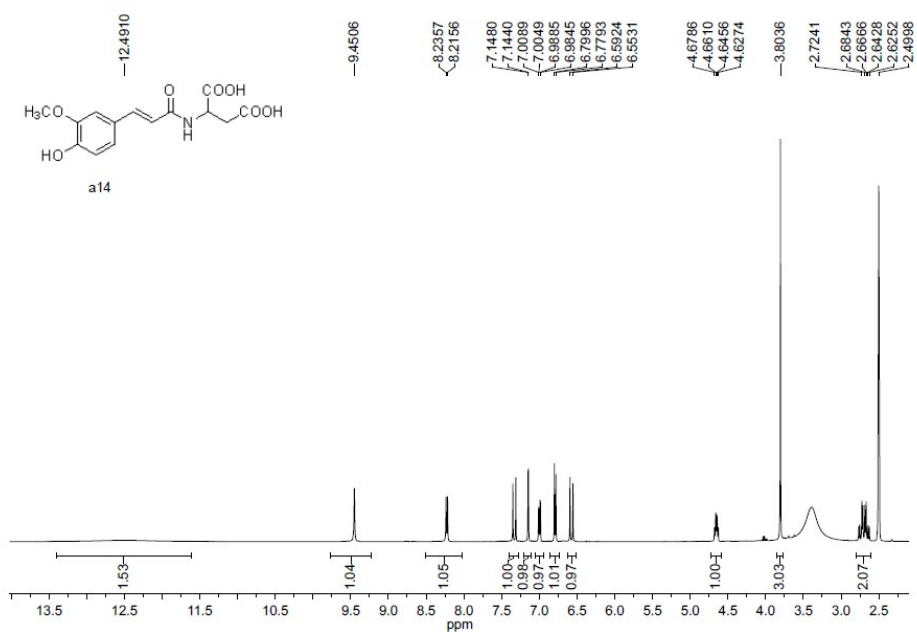



### <sup>1</sup>H NMR spectra of compound **b1**

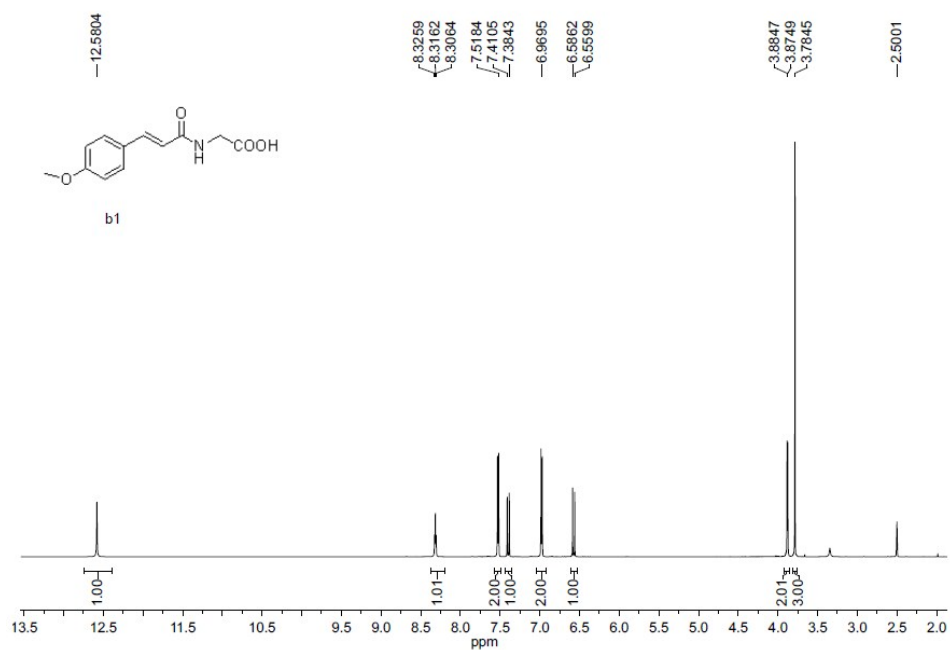

### <sup>1</sup>H NMR spectra of compound **b2**

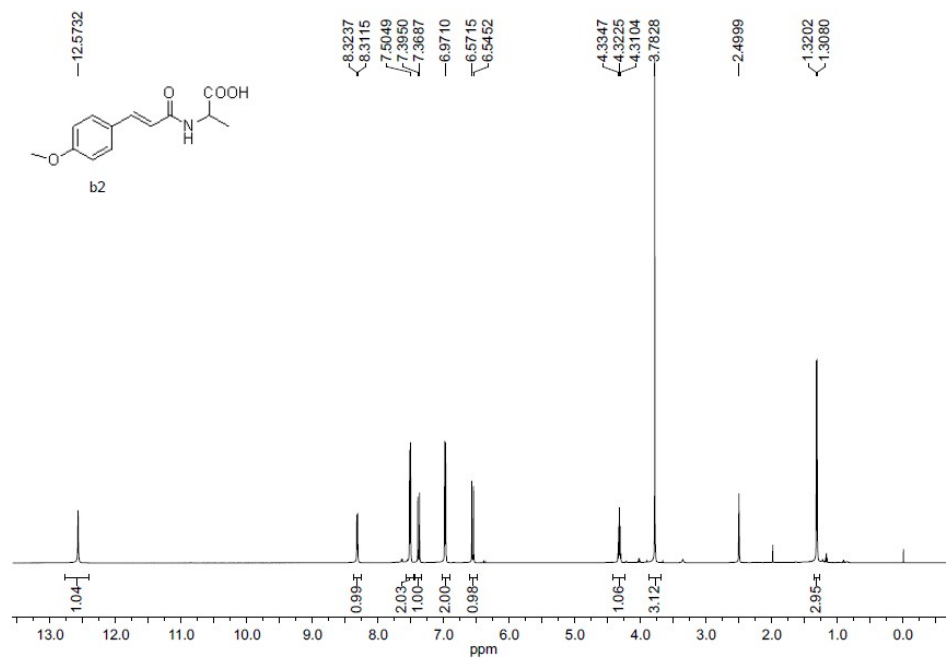

### <sup>1</sup>H NMR spectra of compound **b3**

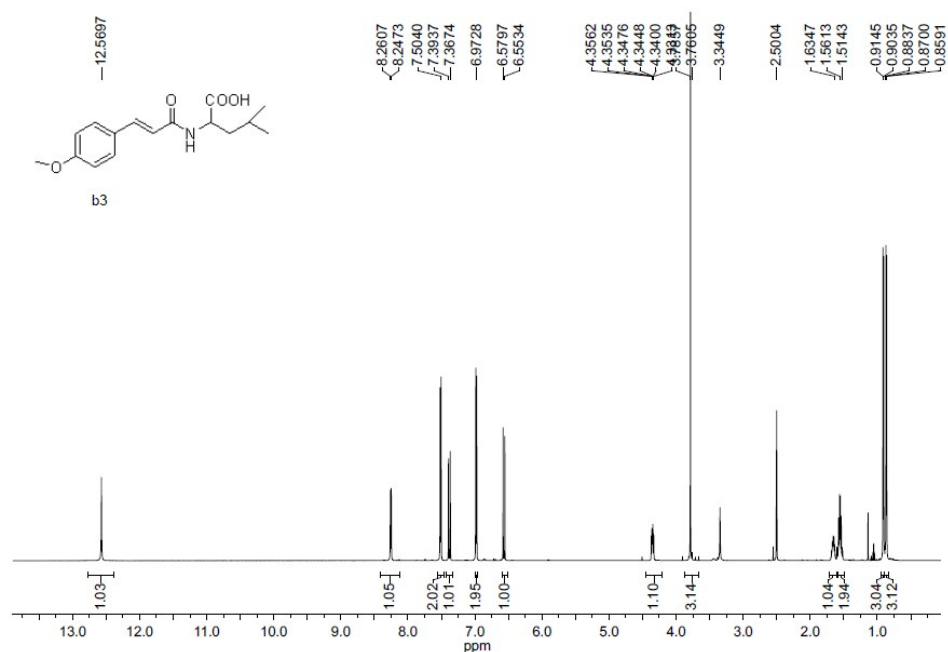

### <sup>1</sup>H NMR spectra of compound **b4**

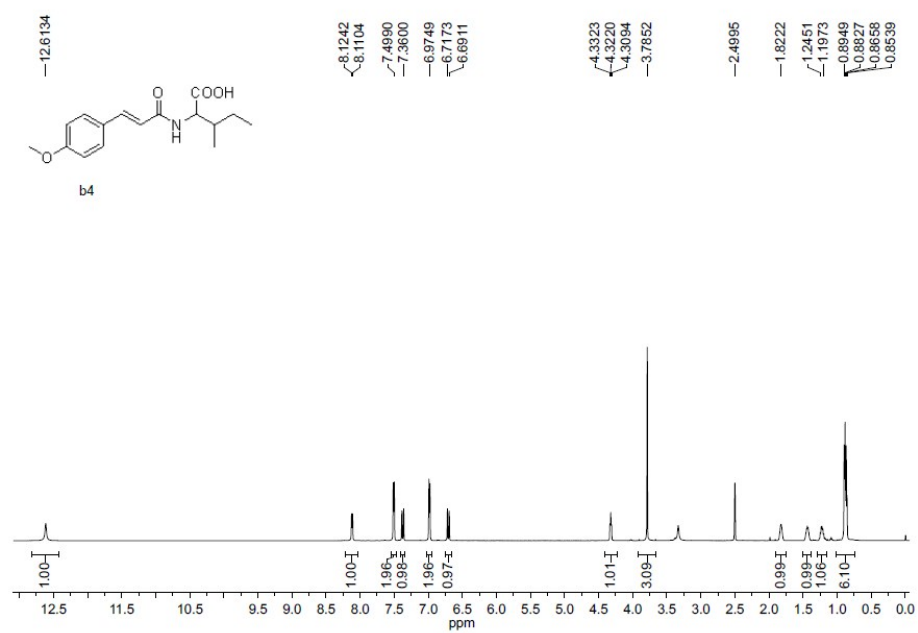

### <sup>1</sup>H NMR spectra of compound **b5**

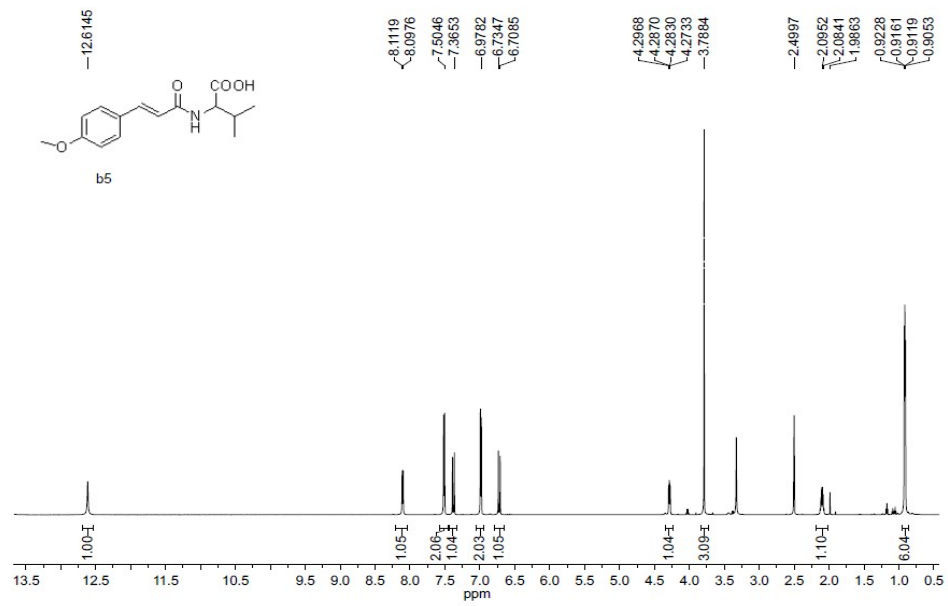

### <sup>1</sup>H NMR spectra of compound **b6**

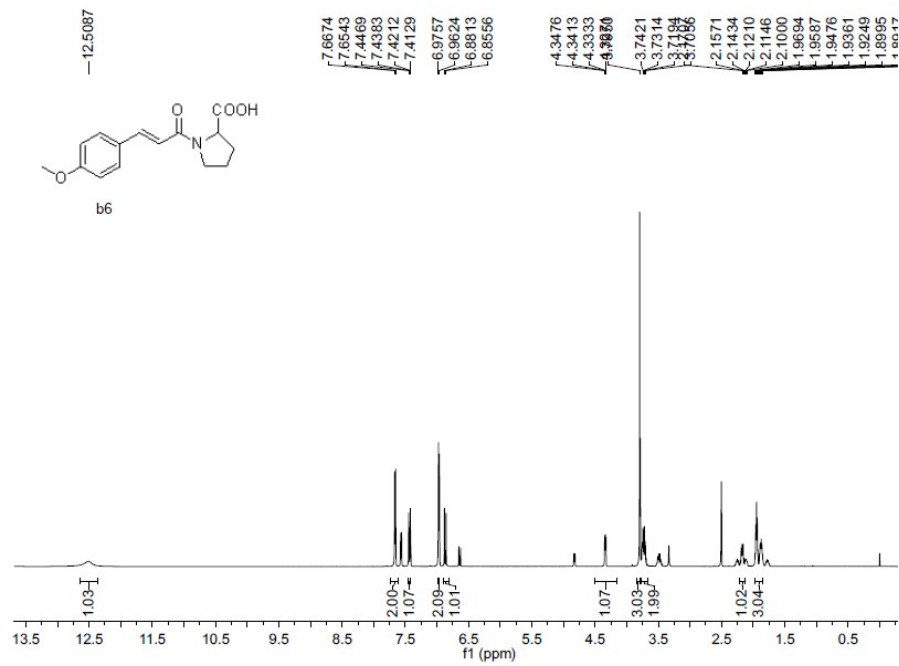

### <sup>1</sup>H NMR spectra of compound **b7**

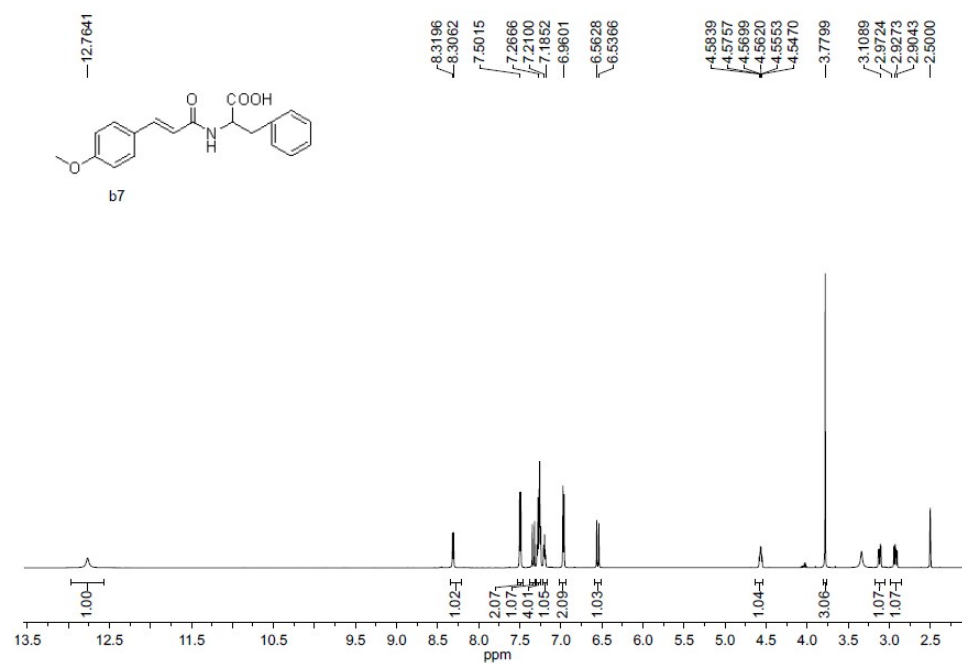

### <sup>1</sup>H NMR spectra of compound **b8**

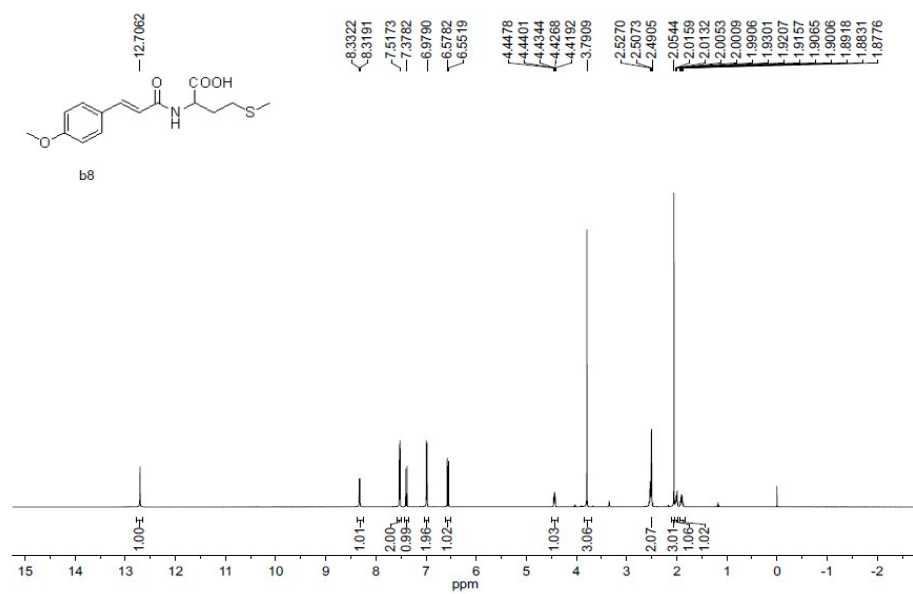

### <sup>1</sup>H NMR spectra of compound **b9**

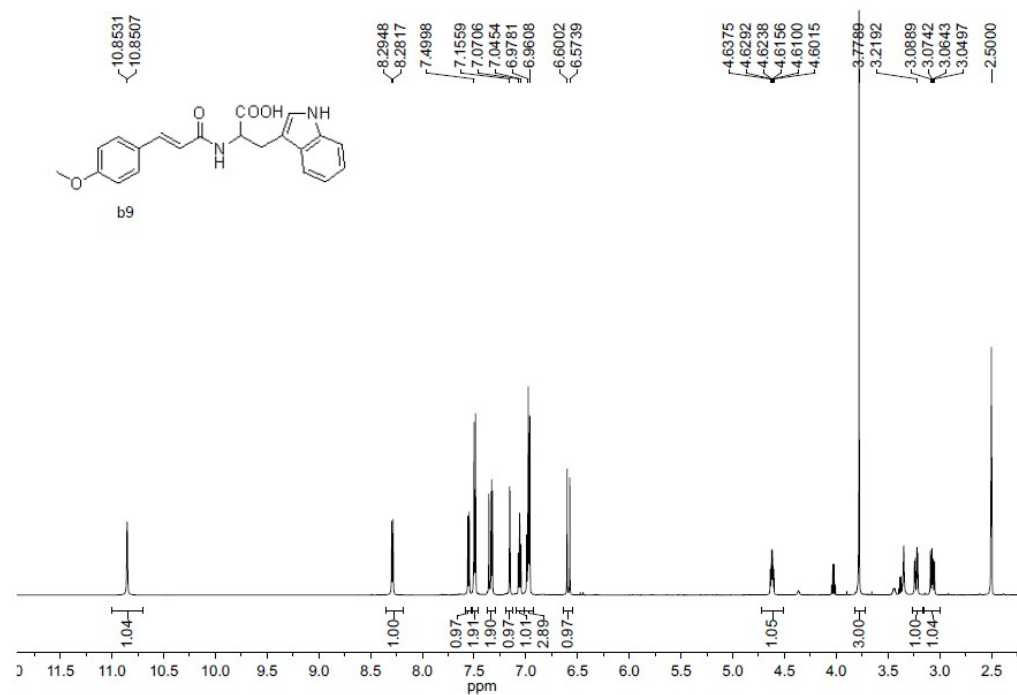

### <sup>1</sup>H NMR spectra of compound **b10**

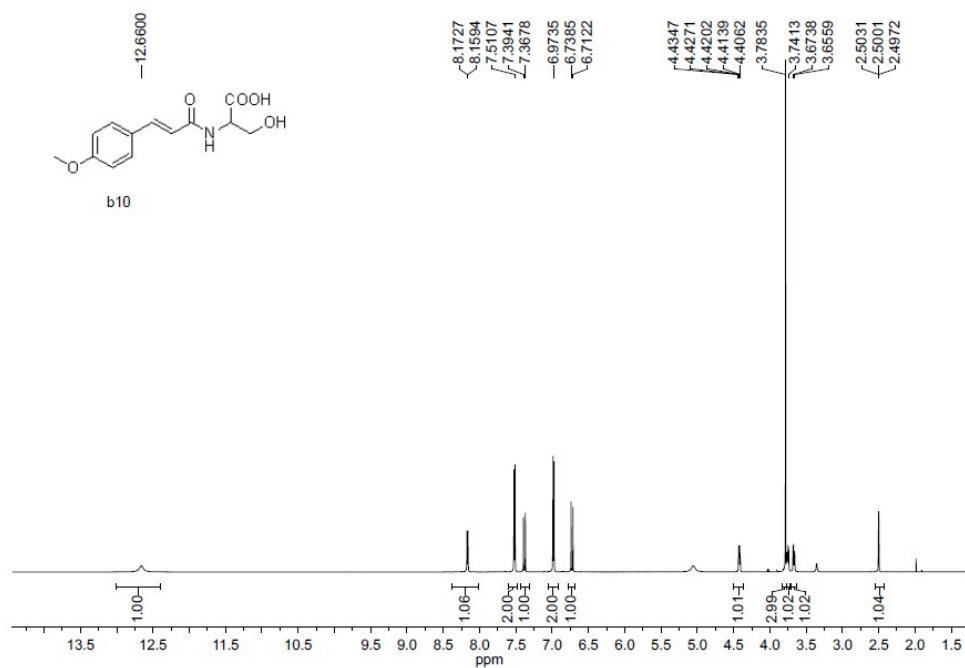

# <sup>1</sup>H NMR spectra of compound **b11**

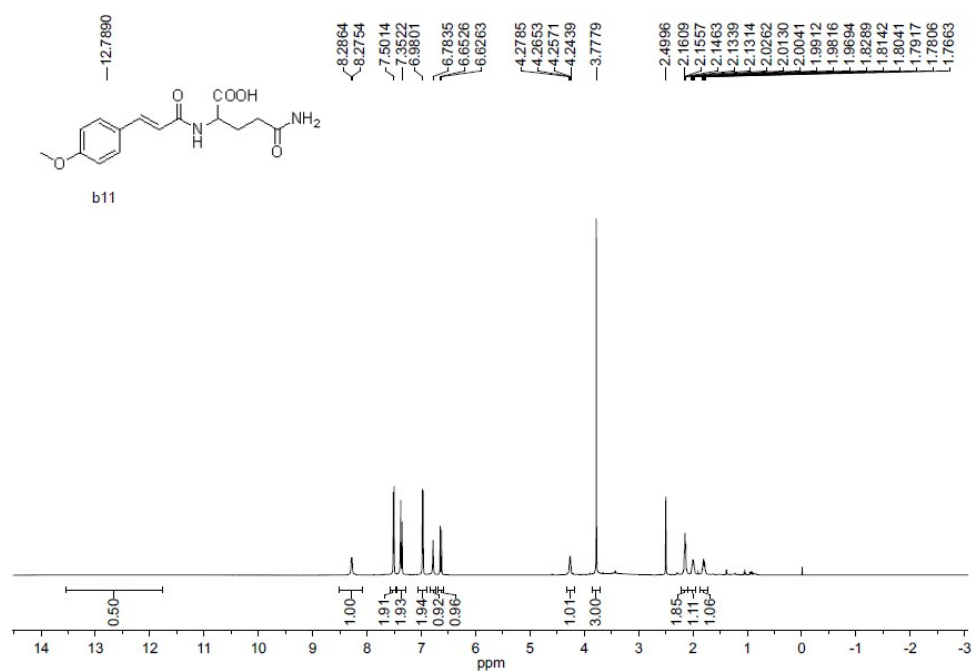

# <sup>1</sup>H NMR spectra of compound **b12**

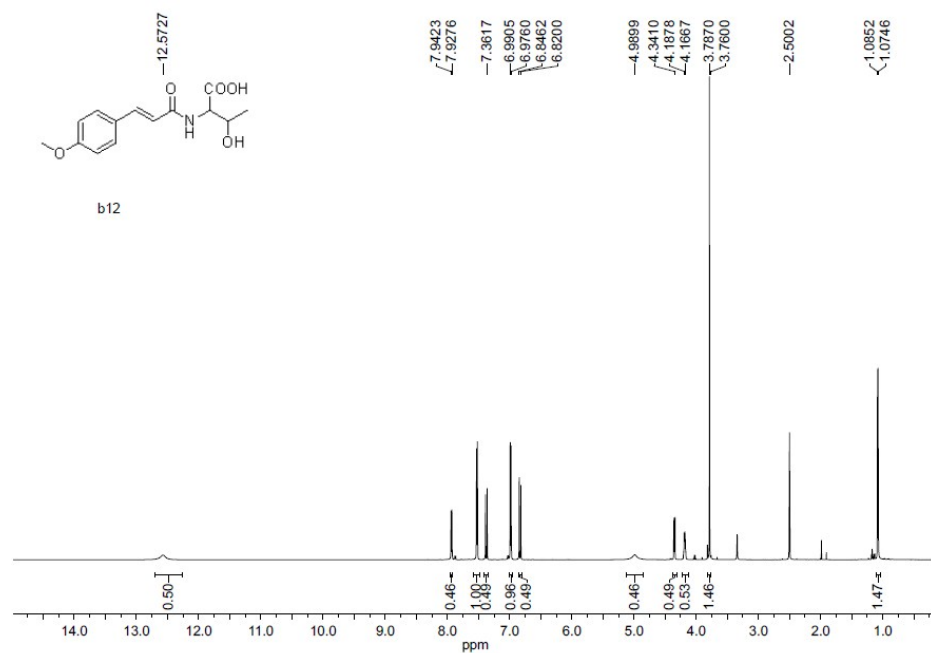



## <sup>1</sup>H NMR spectra of compound **b13**

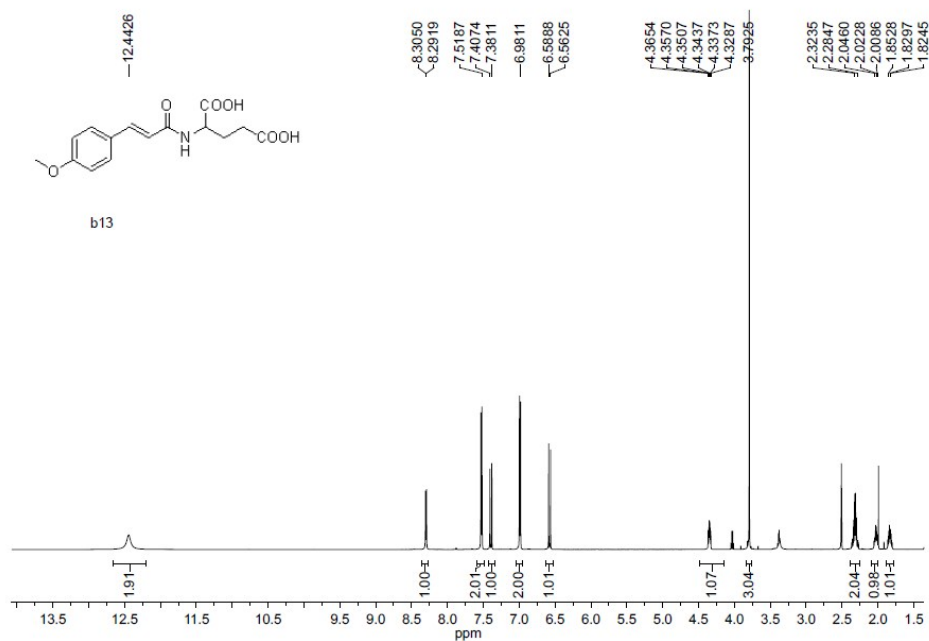

## <sup>1</sup>H NMR spectra of compound **b14**

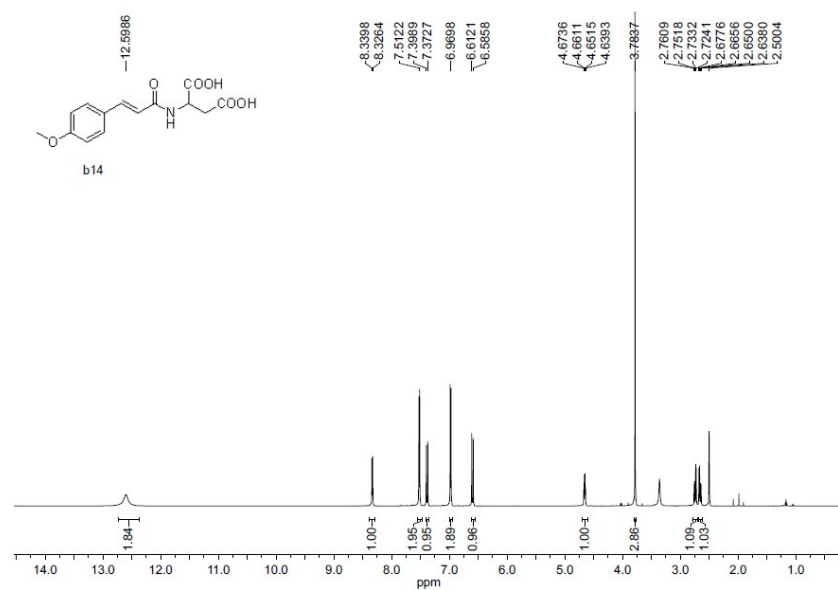

### <sup>1</sup>H NMR spectra of compound **c1**

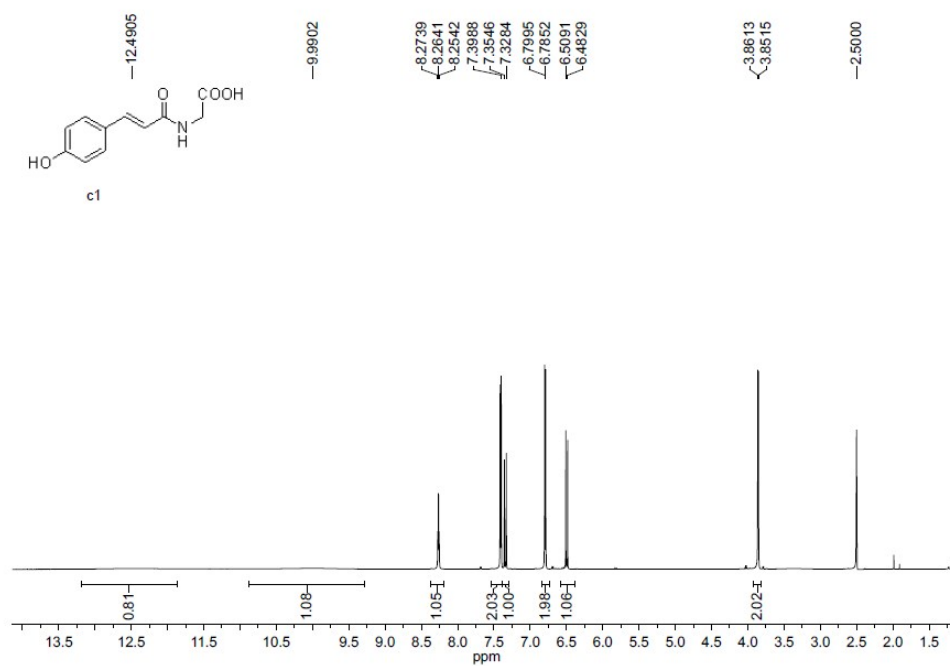

### <sup>1</sup>H NMR spectra of compound **c2**

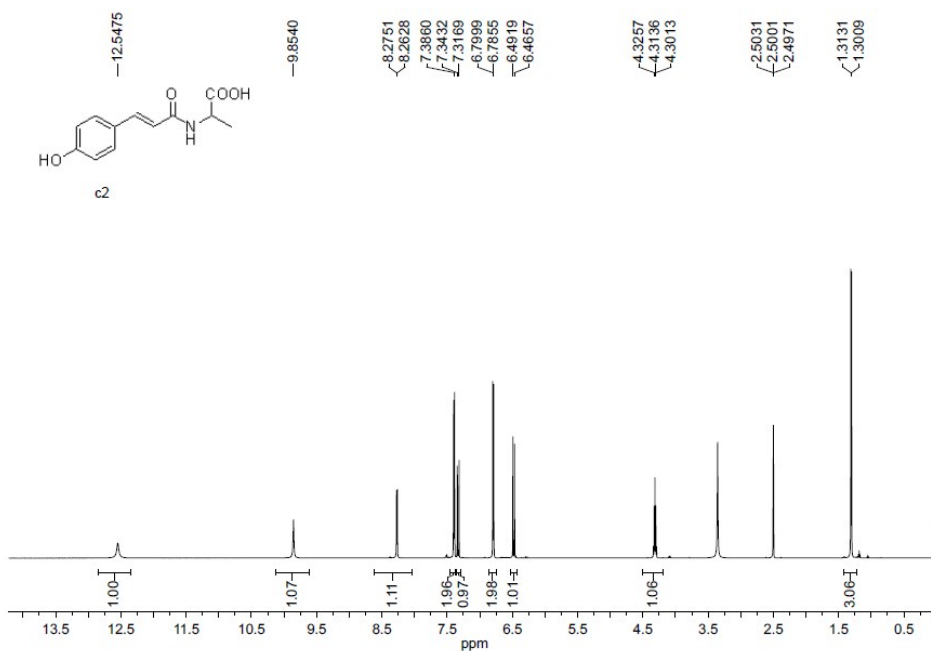

### <sup>1</sup>H NMR spectra of compound **c3**

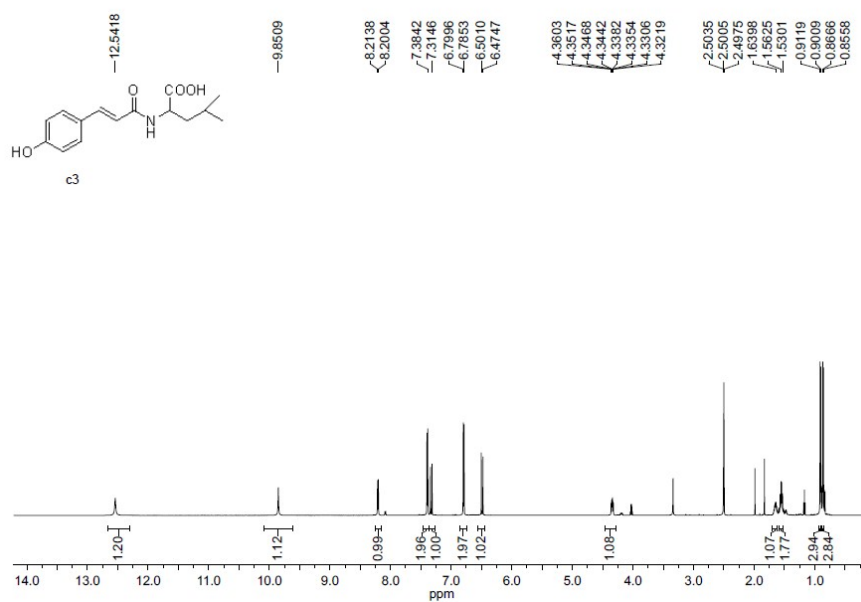

### <sup>1</sup>H NMR spectra of compound **c4**

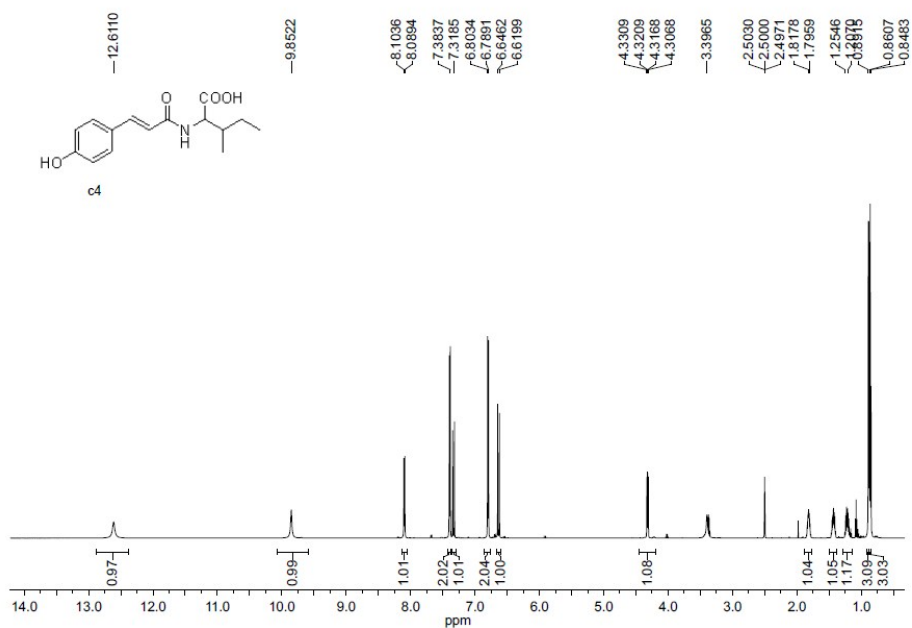

### <sup>1</sup>H NMR spectra of compound **c5**

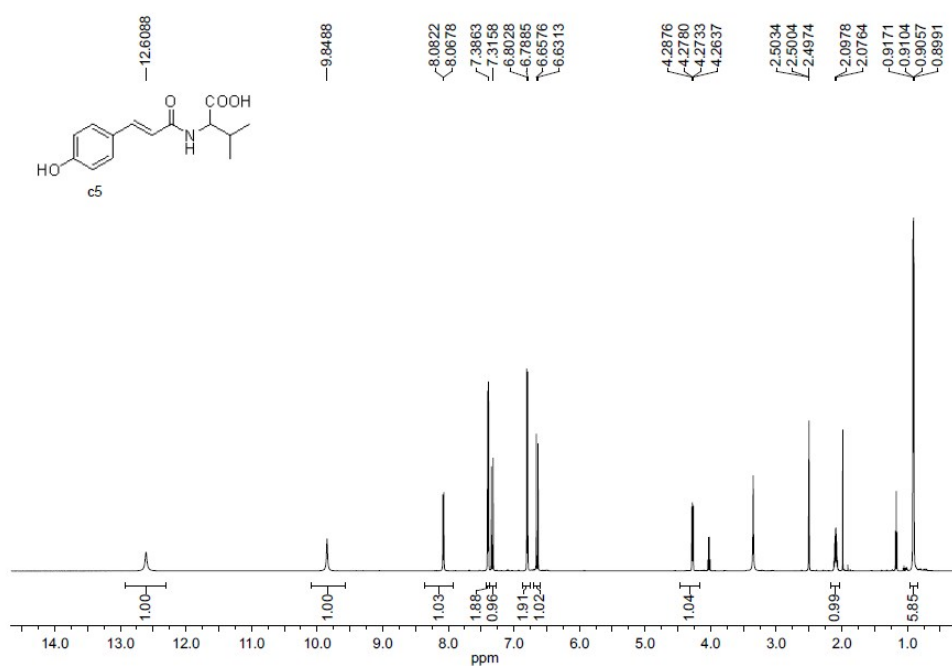

### <sup>1</sup>H NMR spectra of compound **c6**

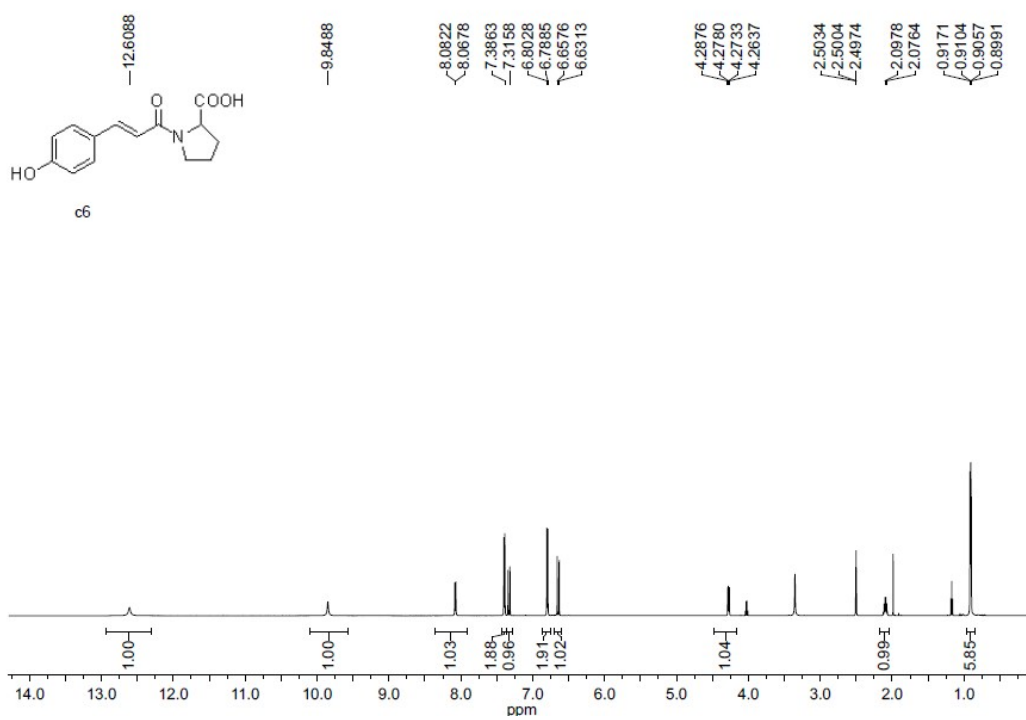

# <sup>1</sup>H NMR spectra of compound **c7**

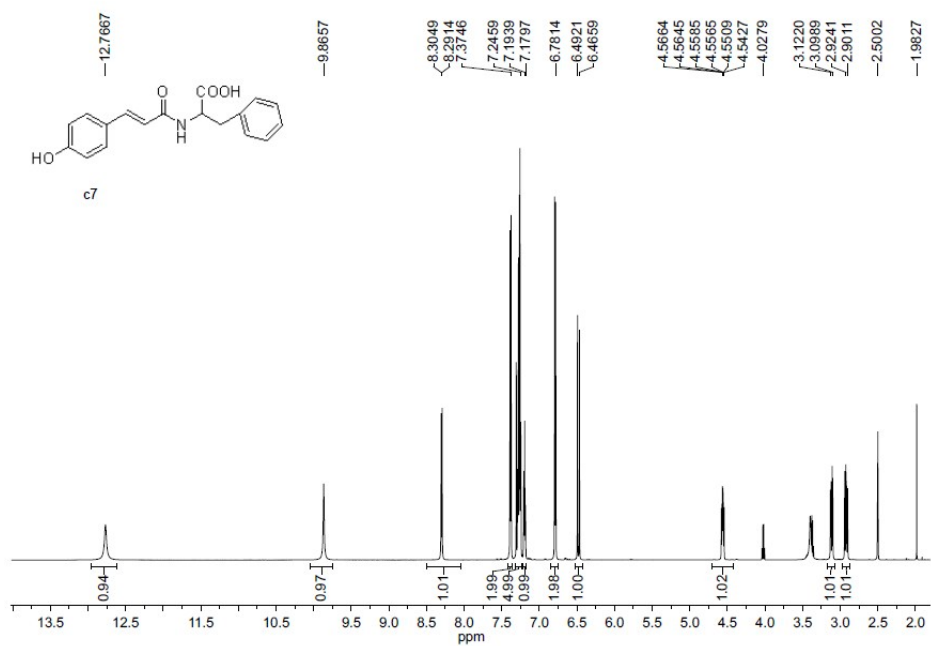

# <sup>1</sup>H NMR spectra of compound **c8**

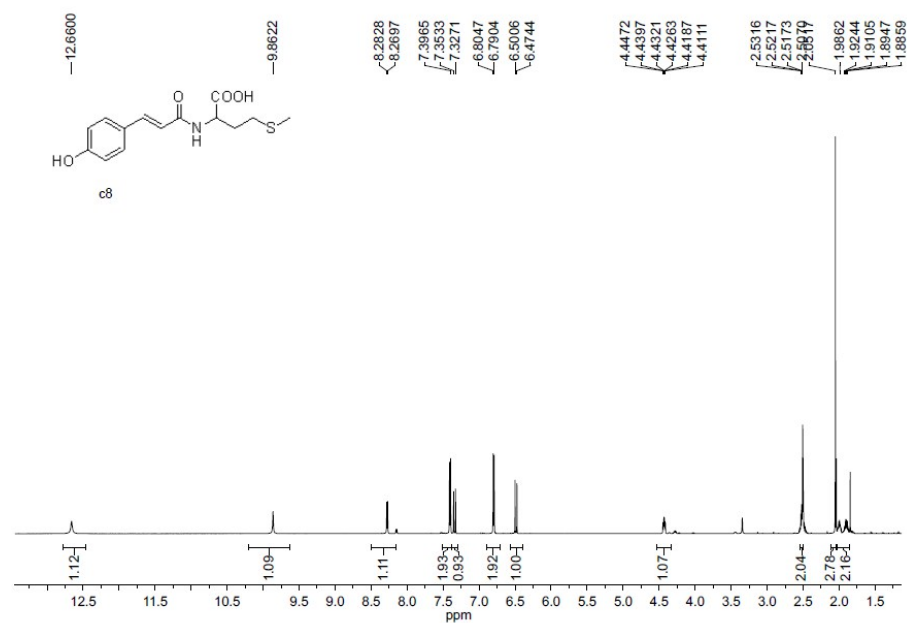

# <sup>1</sup>H NMR spectra of compound **c9**

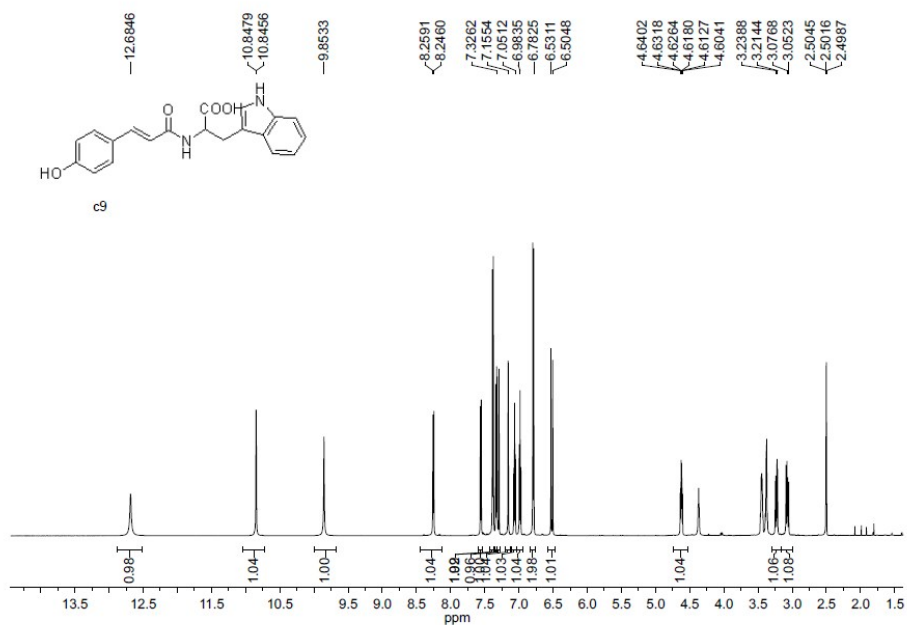

# <sup>1</sup>H NMR spectra of compound **c10**

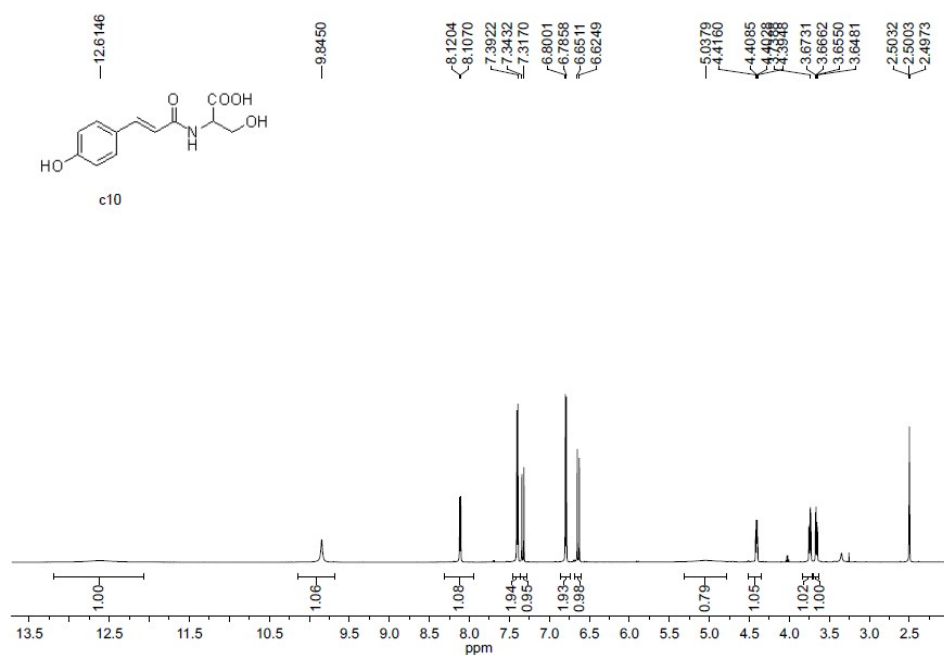

# <sup>1</sup>H NMR spectra of compound **c11**

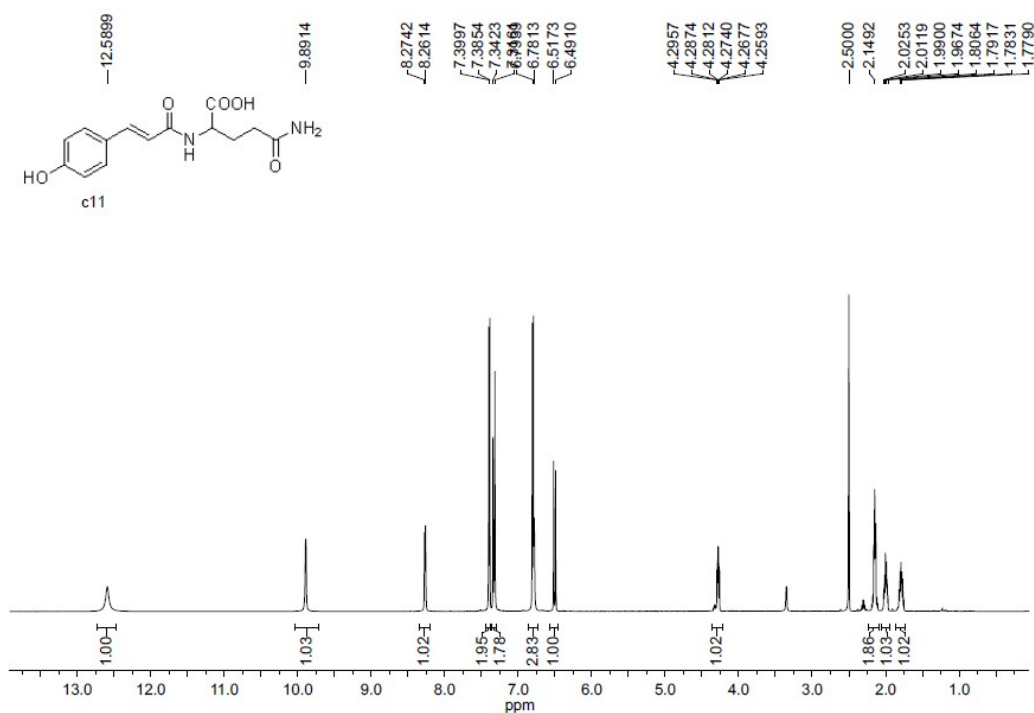

# <sup>1</sup>H NMR spectra of compound **c12**

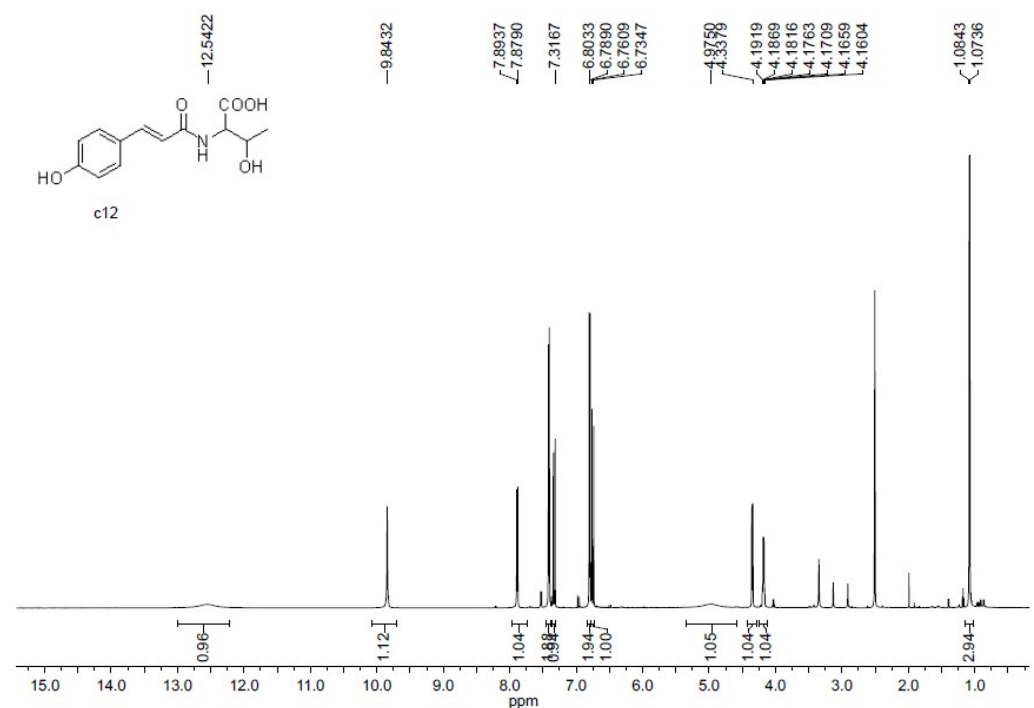

### <sup>1</sup>H NMR spectra of compound **c13**

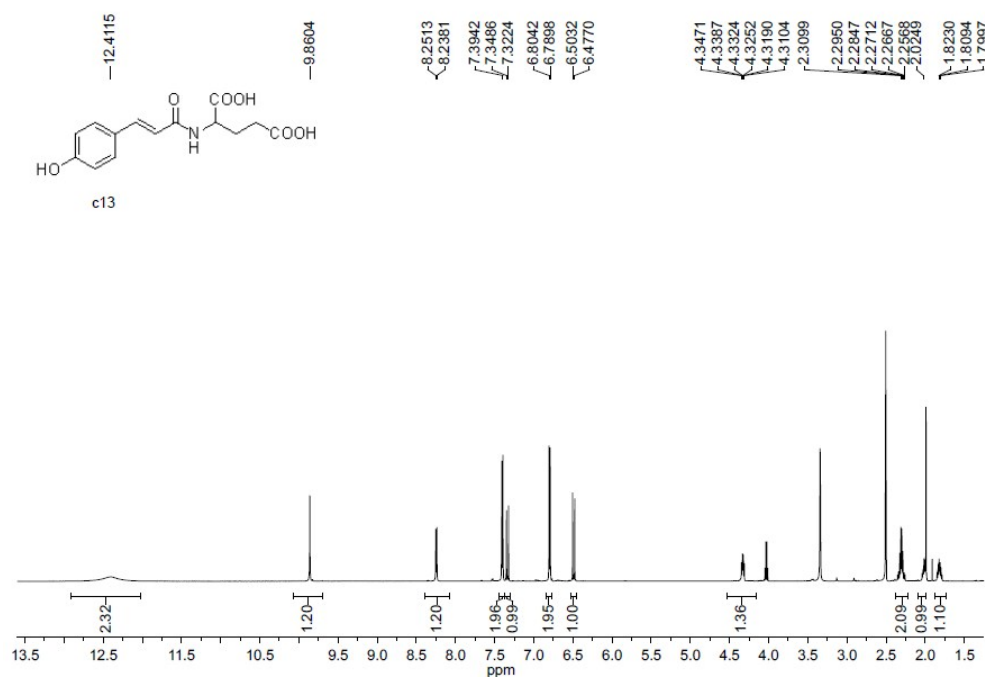

### <sup>1</sup>H NMR spectra of compound **c14**

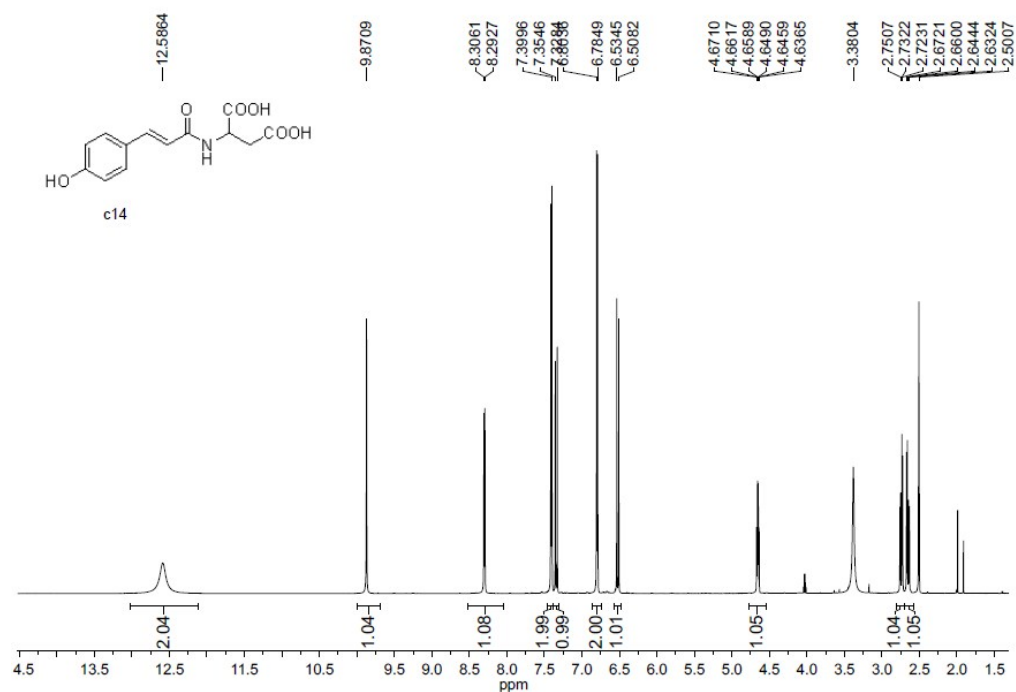

Supplement: c6ra08330g1.pdf [file c6ra08330g1.pdf]
